# Supplementary material for: Differential nuclear import sets the timing of protein access to the embryonic genome
Source: PubMed Central journal article supplement (PMC9537182; doi:10.1038/s41467-022-33429-z), 2022-10-06
Supplement: 41467_2022_33429_MOESM9_ESM.pdf [file 41467_2022_33429_MOESM9_ESM.pdf]

The full content of this file cannot be displayed with your current PDF viewer. Please update to the latest possible version to view this document.
